# Supplementary material
Source: PubMed Central journal article supplement (PMC8013063)
Supplement: 4159_figures.pdf [file 4159_figures.pdf]

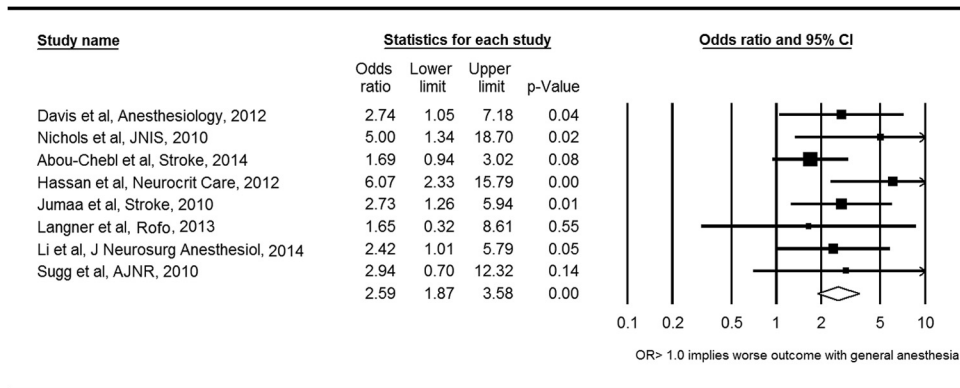

ON-LINE FIG 1. Forest plot for mortality by anesthesia type.

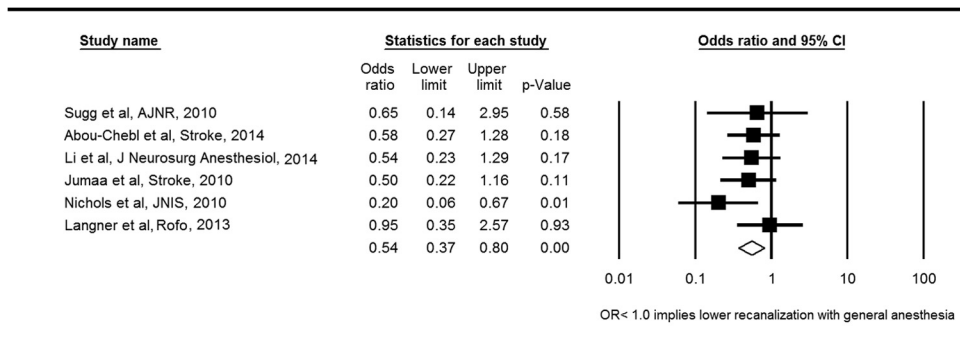

ON-LINE FIG 2. Forest plot for successful recanalization by anesthesia type.

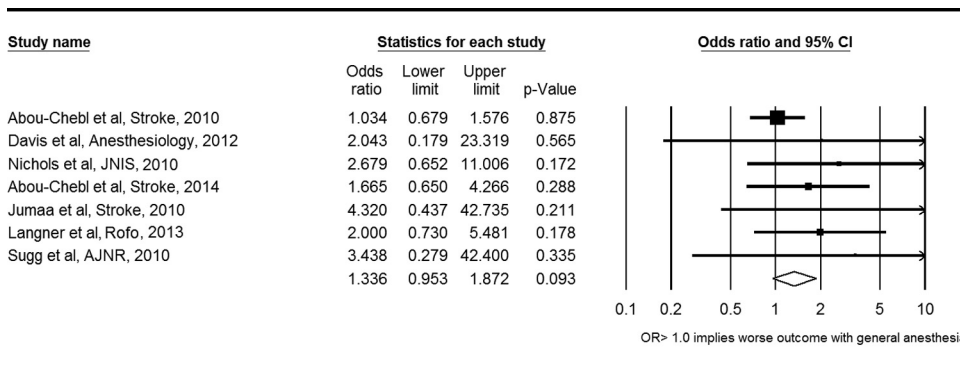

ON-LINE FIG 3. Forest plot for symptomatic ICH by anesthesia type.

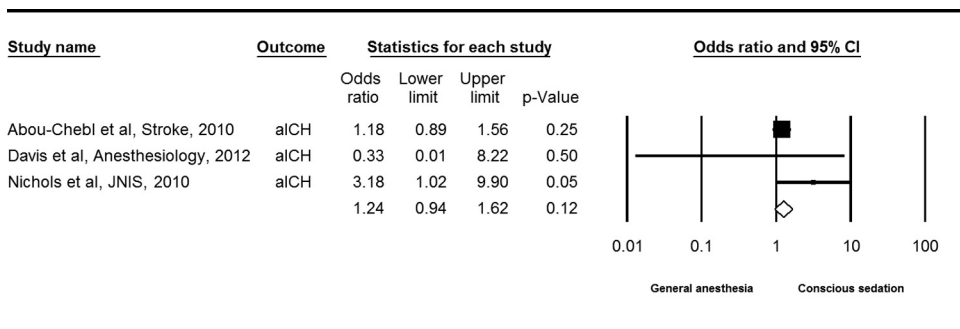

ON-LINE FIG 4. Forest plot for asymptomatic ICH by anesthesia type.

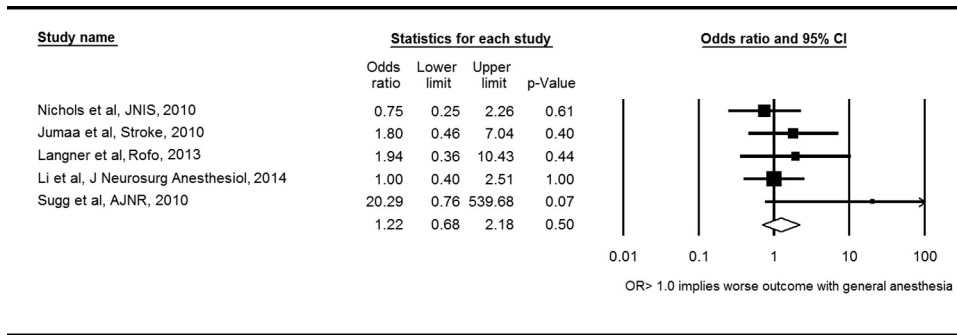

**ON-LINE FIG 5.** Forest plot for other vascular complications by anesthesia type.

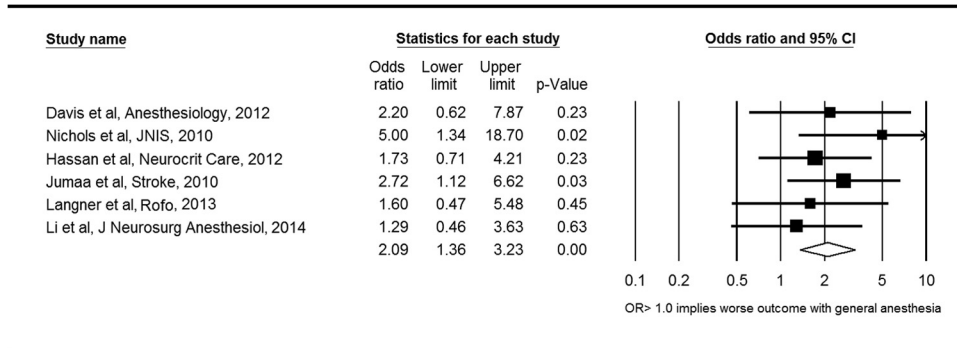

**ON-LINE FIG 6.** Forest plot for respiratory complications by anesthesia type.
